# Supplementary material for: Human NK cells confer protection against HIV-1 infection in humanized mice
Source: JCI journal article supplement (doi:10.1172/jci162694), 2022-10-25
Supplement: sd1 [file 1]

301 Moved Permanently

# Moved Permanently

The document has moved here.
