# Supplementary material for: Human NK cells confer protection against HIV-1 infection in humanized mice
Source: JCI journal article supplement (doi:10.1172/jci162694), 2022-10-25
Supplement: sd1 [file 1]

Figure S1

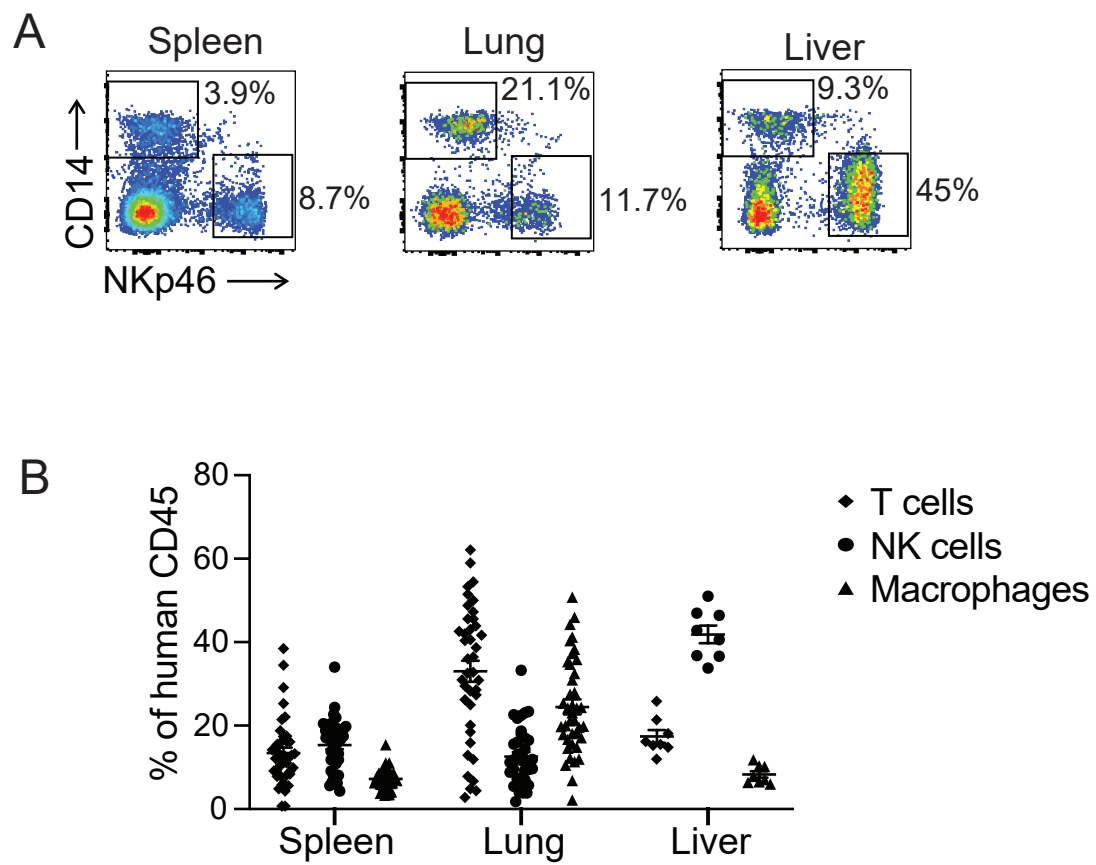

**Supplemental Fig. 1. Immune cell distribution in MISTRG-6-15 mice.**

**A**, Representative flow of CD14 and NKp46 staining in spleen, lung and liver. **B**, Percentage of human T cells (CD3), NK cells (NKp46), and macrophages (CD14) in spleen, lung, and liver.

Results from several independent cohorts were combined.

Figure S2

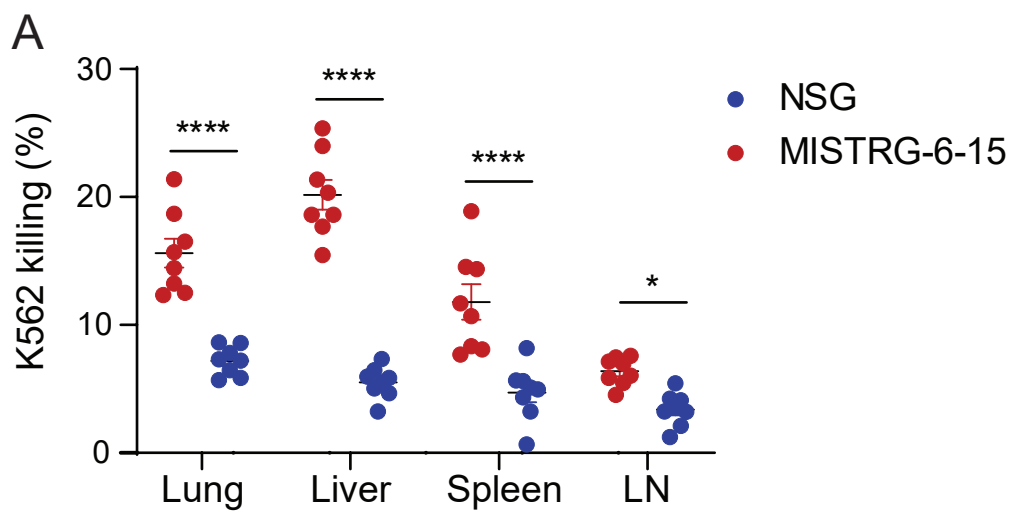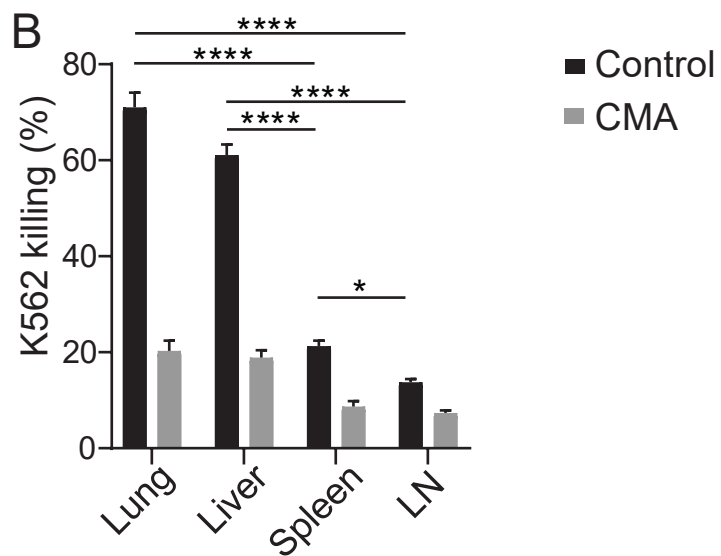

**Supplemental Fig. 2. K562 killing by NK cells from NSG and MISTRG-6-15 mice.**

**A**, ex vivo killing of K562 by purified tissue NK cells after 4 hours of co-culture. **B**, ex vivo killing of K562 by purified tissue NK cells from MISTRG-6-15 mice with and without concanamycin A. NK cells and K562 cells were co-cultured at 1:1 for 4 hours before flow cytometry analysis. Error bars show mean values with SEM. P-values were calculated using a two-way ANOVA with Tukey multi-comparison post-test. \* denotes p-value <0.05, \*\* denotes p-value <0.01, \*\*\* denotes p-value <0.001, and \*\*\*\* denotes p-value <0.0001.

Figure S3

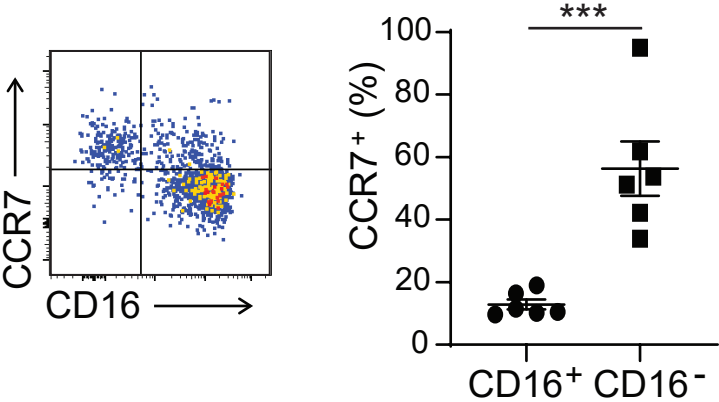

**Supplemental Fig. 3. CCR7 and CD16 expression in NK cells.**

Representative flow plot of CCR7 and CD16 expression in blood NK cells. Percentage of CCR7<sup>+</sup> in CD16<sup>+</sup> and CD16<sup>-</sup> NK cells. Error bars show mean values with SEM. Unpaired, two-tailed t-test used. \*\*\* denotes  $p$ -value <0.001.

Figure S4

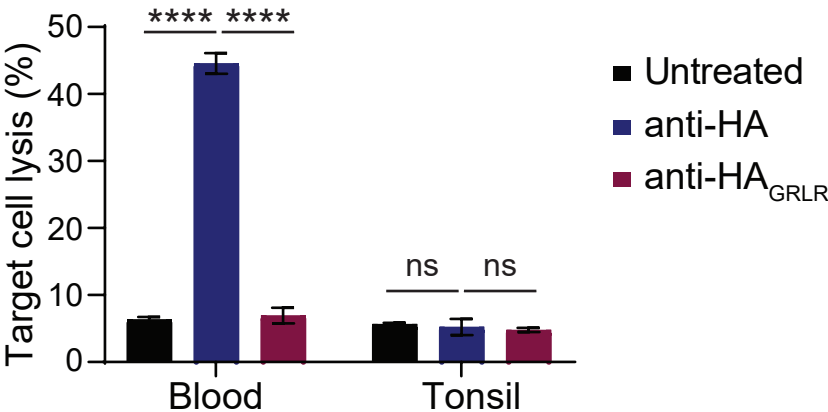

**Supplemental Fig. 4. Killing of HIV-1-infected CD4<sup>+</sup> cells by NK cells from blood and tonsil tissues.**

CD4<sup>+</sup> T cells infected with HIV<sub>1</sub>-HA virus were co-cultured with autologous NK cells from either blood or tonsils as noted at 1:1 for 4 hours with the presence of anti-HA or anti-HA<sub>GRLR</sub> (1μg/ml). Target cells lysis was determined by the percentage of lysed infected cells (CD3<sup>+</sup>CD8<sup>+</sup>HA<sup>+</sup>7-AAD<sup>+</sup>) in the total infected cells (CD3<sup>+</sup>CD8<sup>+</sup>HA<sup>+</sup>). Error bars show mean values with SEM. *P*-values were calculated using a two-way ANOVA with Tukey multi-comparison post-test. \*\*\*\* denotes *p*-value <0.0001.



**Figure S5**

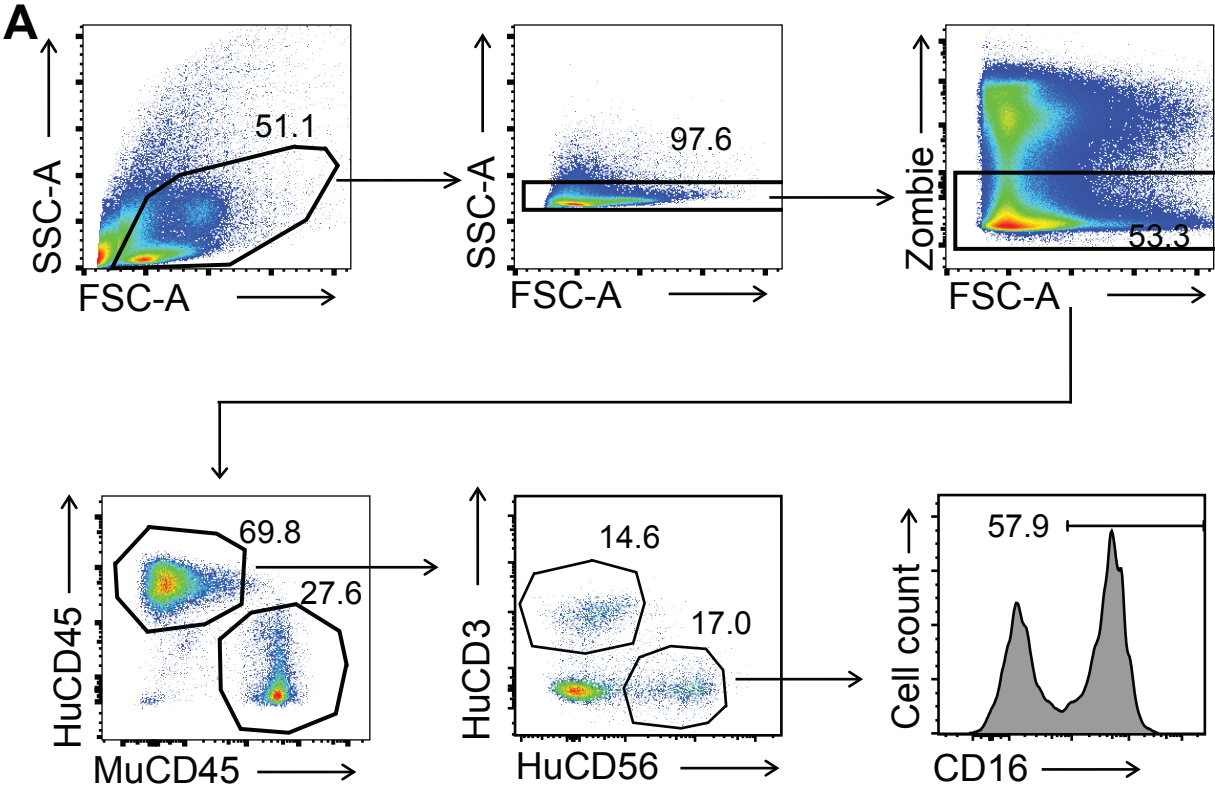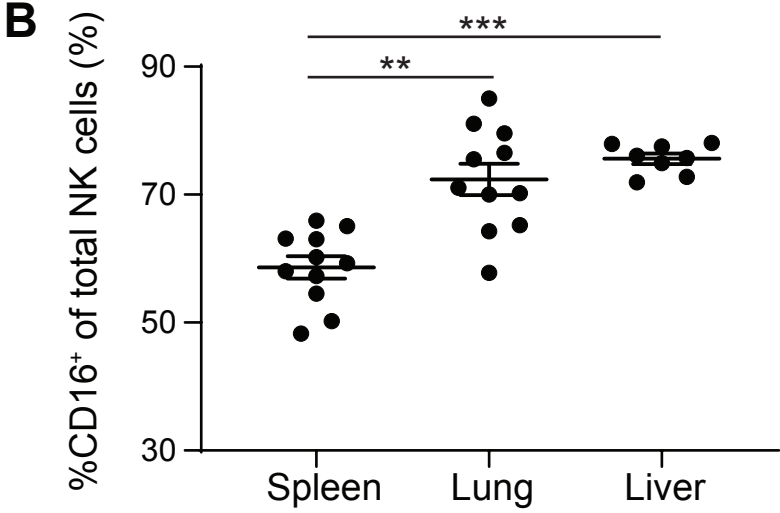

**Supplemental Fig. 5. CD16<sup>+</sup> NK cells in MISTRG-6-15 mice.**

**A**, Human NK cell gating strategy. Total splenocytes were used. **B**, percentage of CD16<sup>+</sup> NK cells in spleen, lung and liver. Error bars show mean values with SEM. *P*-values were calculated using a one-way ANOVA with Tukey multi-comparison post-test. \*\* denotes p-value <0.01 and \*\*\* denotes p-value <0.001.

Figure S6

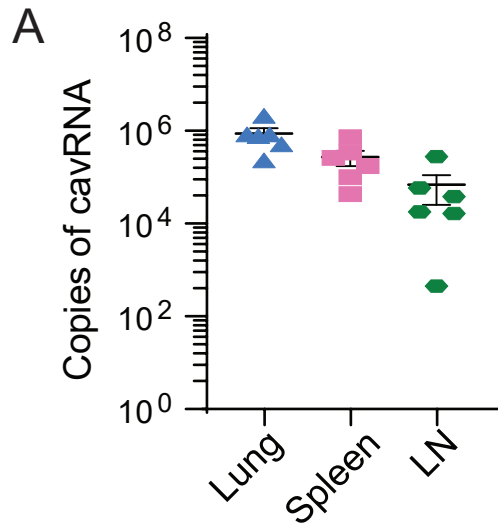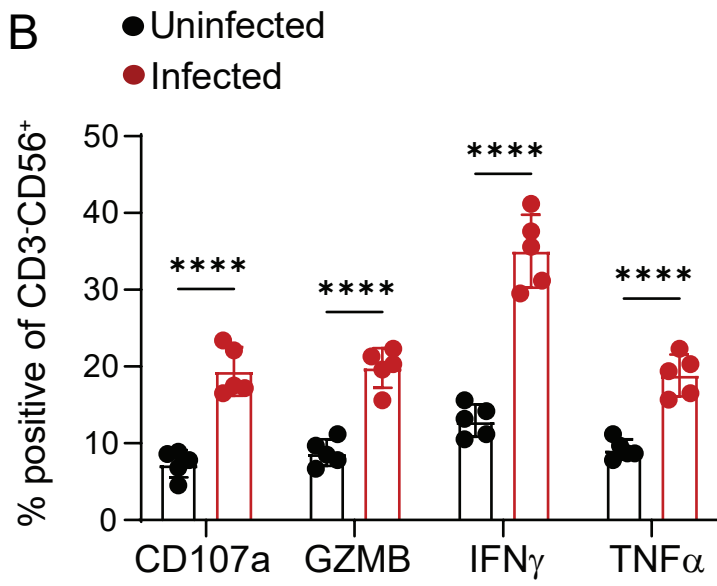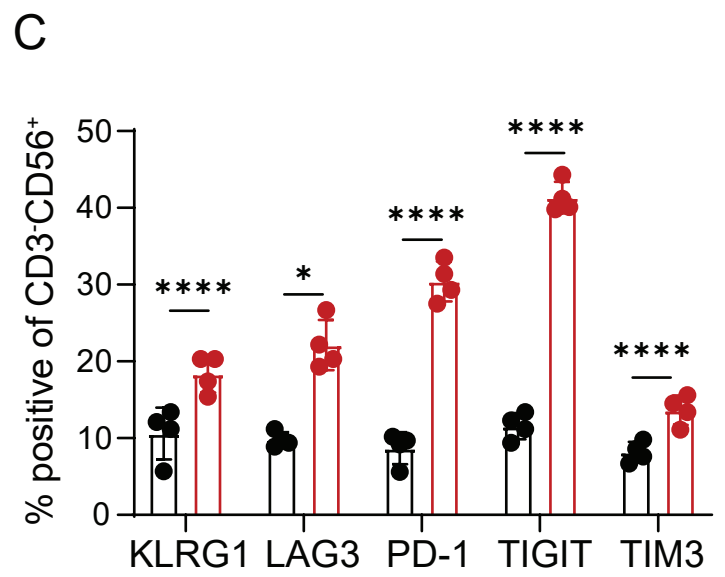

**Supplemental Fig. 6. HIV-1 infection and blood NK responses.**

MISTRG-6-15 mice were infected with HIV-1<sub>BAL</sub>. Blood and tissues were collected on day 21 post infection. **A**, Copies of cell-associated viral RNA (cavRNA) in lung, spleen and LN. **B**, Percentage of blood NK cells positive for CD107a, GZMB, IFN $\gamma$ , and TNF $\alpha$  after ex vivo stimulation with PMA/ionomycin for 4 hours. **C**, Percentage of blood NK cells positive for KLRG1, LAG3, PD-1, TIGIT, and TIM3. Error bars show mean values with SEM. *P*-values were calculated using two-way ANOVA with Sidak's multiple comparison test. \* denotes *p*-value <0.05, and \*\*\*\* denotes *p*-value <0.0001.

Figure S7

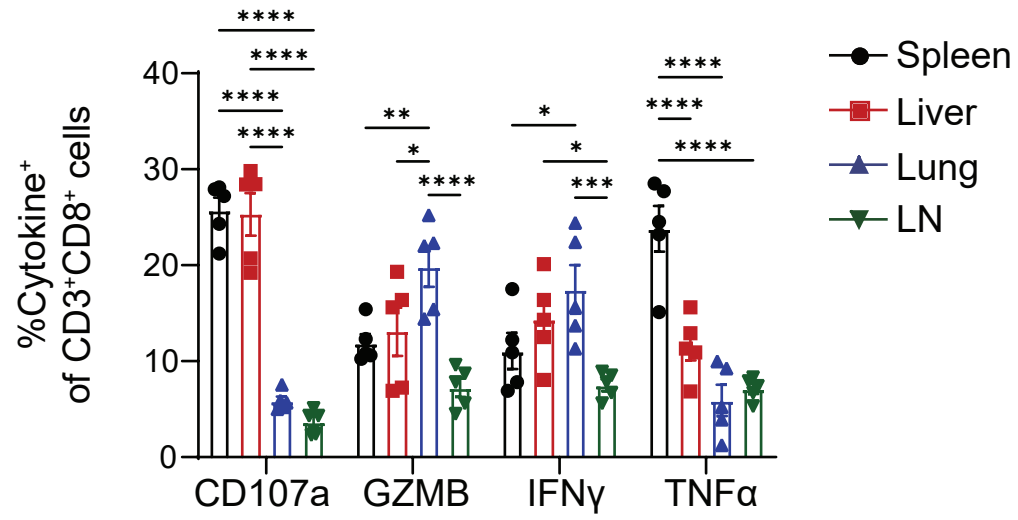

**Supplemental Fig. 7. Functionality of CD8<sup>+</sup> T cells during HIV-1 infection in different organs.**

MISTRG-6-15 mice were infected with HIV-1<sub>BAL</sub>. Tissues were collected on day 21 post infection. Percentage of CD8<sup>+</sup> T cells positive for either CD107a, granzyme B, IFN $\gamma$ , or TNF $\alpha$  in spleen, liver, lung, and lymph nodes after ex vivo stimulation with PMA/ionomycin for 4 hours. CD8<sup>+</sup> T cells were gated on huCD45<sup>+</sup>CD3<sup>+</sup>CD8<sup>+</sup>. Error bars show mean values with SEM. *P*-values were calculated using two-way ANOVA with Tukey multi-comparison post-test. \* denotes p-value <0.05, \*\* denotes p-value <0.01, \*\*\* denotes p-value <0.001, and \*\*\*\* denotes p-value <0.0001.

Figure S8

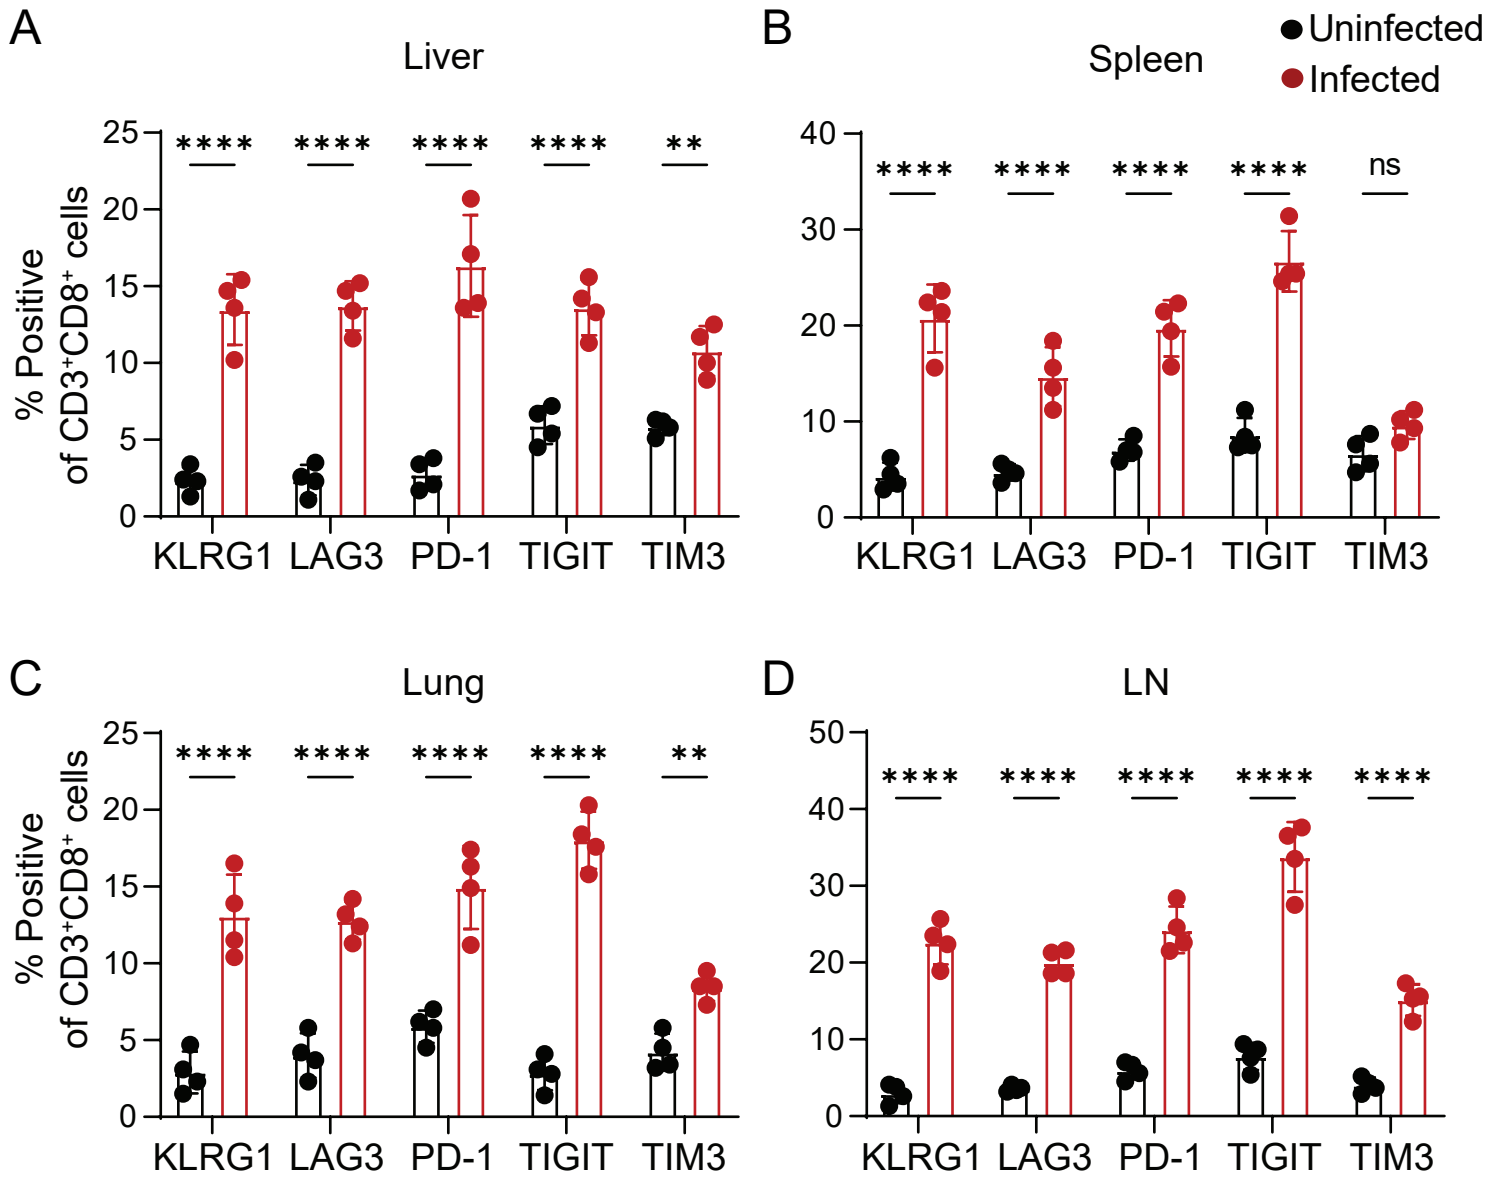

**Supplemental Fig. 8. ICR expression in CD8<sup>+</sup> T cells during HIV-1 infection in different organs.**

MISTRG-6-15 mice were infected with HIV-1<sub>BAL</sub>. Tissues were collected on day 21 post infection. Percentage of tissue CD8<sup>+</sup> T cells positive for KLRG1, LAG3, PD-1, TIGIT, and TIM3 in liver, spleen, lung, and lymph nodes. CD8<sup>+</sup> T cells were gated on huCD45<sup>+</sup>CD3<sup>+</sup>CD8<sup>+</sup>. Error bars show mean values with SEM. *P*-values were calculated using two-way ANOVA with Sidak's multiple comparison test. \*\* denotes p-value <0.01, and \*\*\*\* denotes p-value <0.0001.



Figure S9

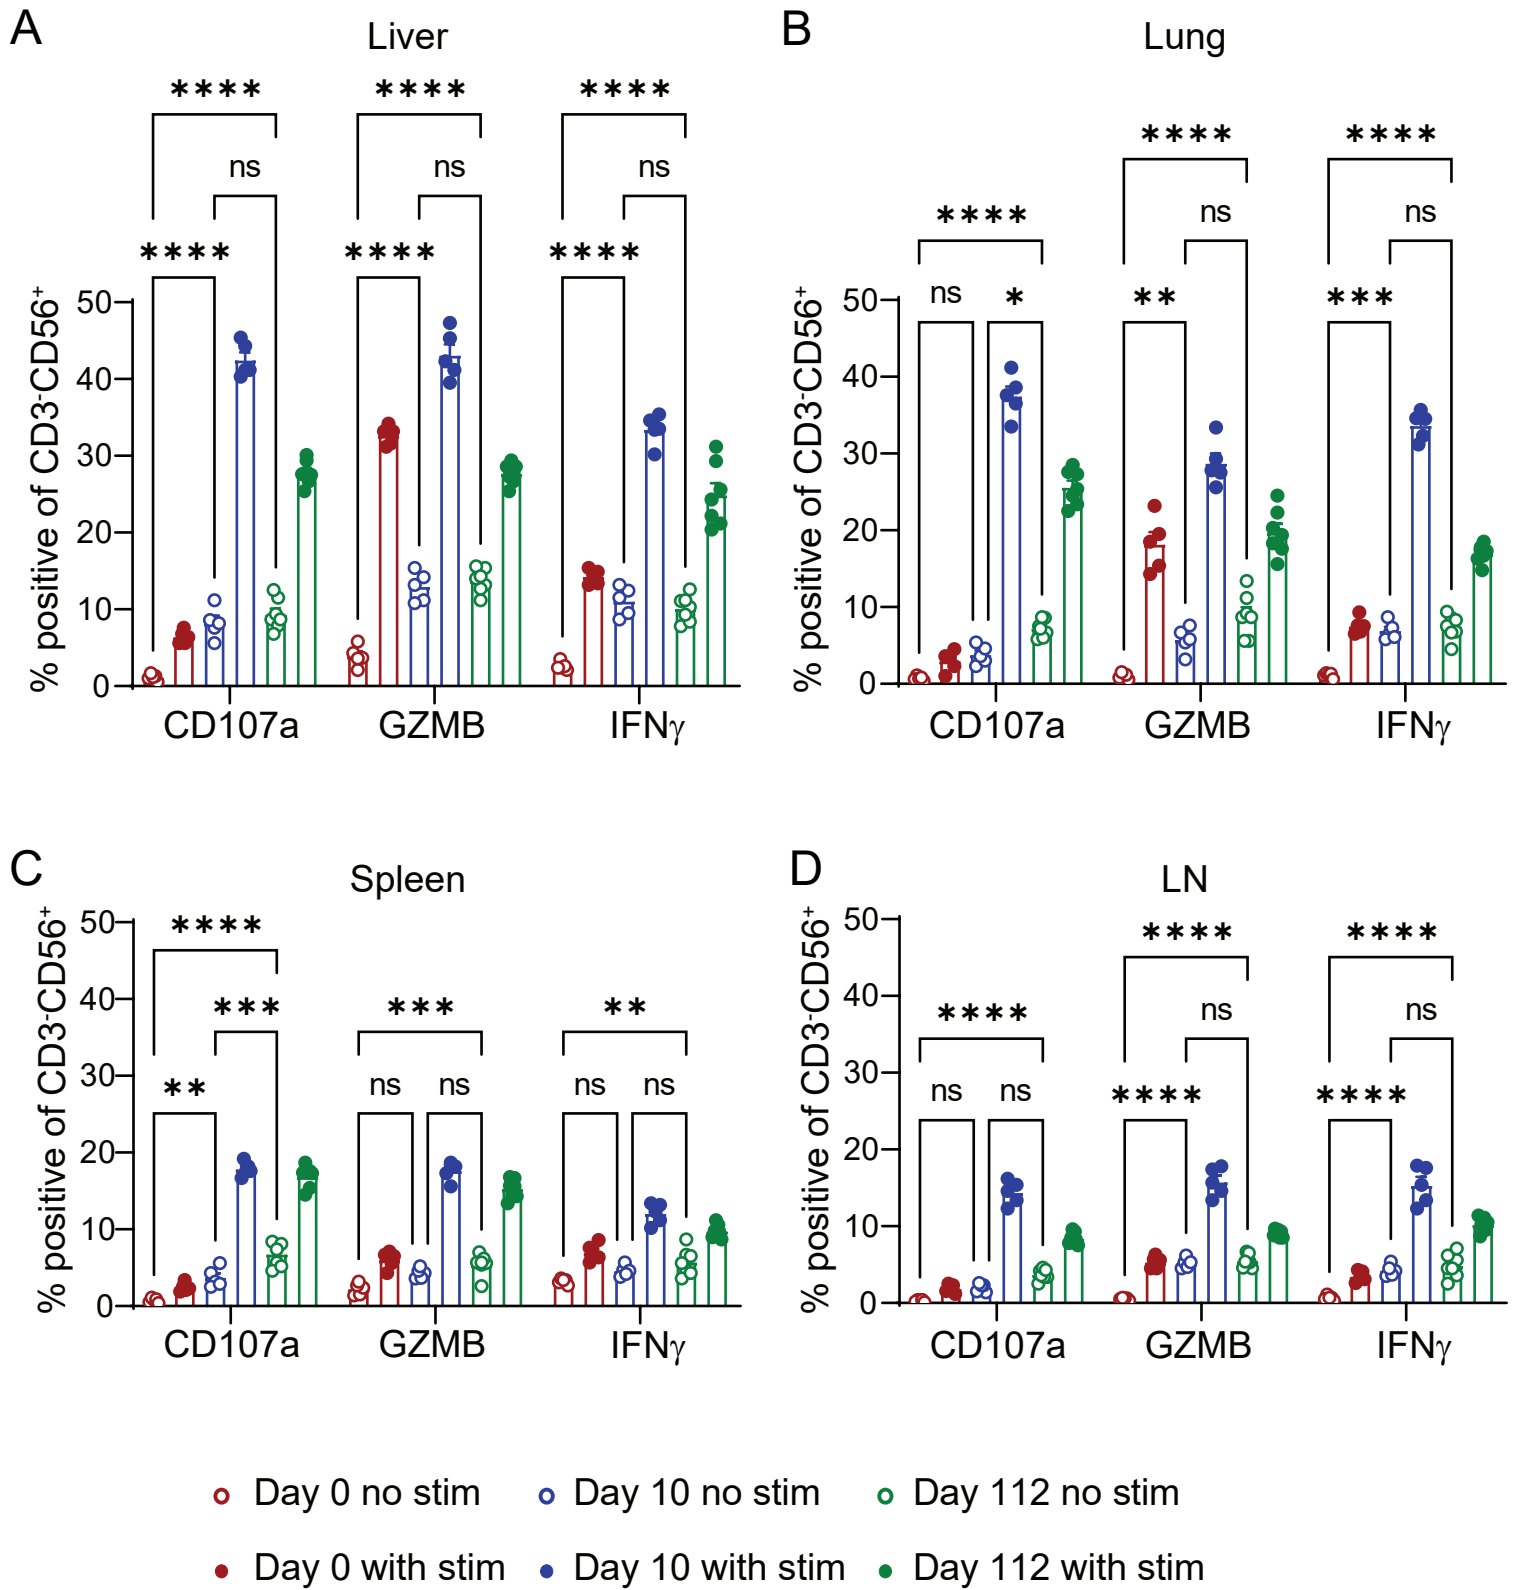

**Supplemental Fig. 9. NK cell response throughout the course of HIV-1 infection.**

MISTRG-6-15 mice were infected with HIV-1<sub>BAL</sub>. Tissue analyses were performed on day 0, 10, and 112 post infection. 4-6 mice at each time point were included. Percentage of CD107a<sup>+</sup>, GZMB<sup>+</sup>, and IFN $\gamma$ <sup>+</sup> NK cells in liver, lung, spleen, and LN with or without ex vivo stimulation with PMA/ionomycin for 4 hours. NK cells were gated on huCD45<sup>+</sup>CD3<sup>-</sup>CD56<sup>+</sup>. Error bars show mean values with SEM. *P*-values were calculated using two-way ANOVA with Tukey multi-comparison post-test. \*\* denotes p-value <0.01, \*\*\* denotes p-value <0.001, and \*\*\*\* denotes p-value <0.0001.

Figure S10

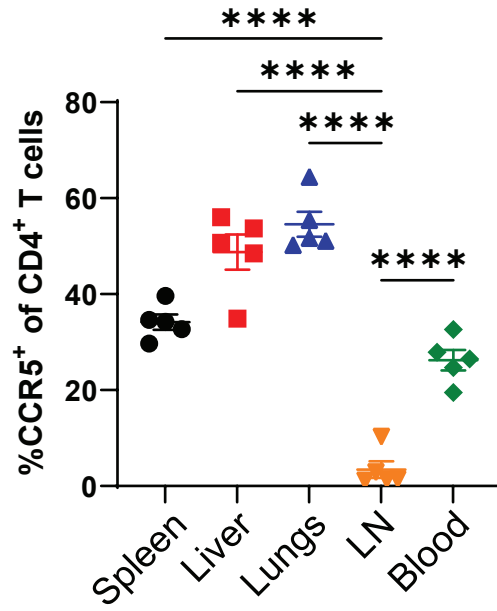

**Supplemental Fig. 10. CCR5<sup>+</sup>CD4<sup>+</sup> T cells in tissues.**

Percentage of CCR5<sup>+</sup> of total CD4<sup>+</sup> T cells in spleen, liver, lung, LN, and blood of MISTRG-6-15 mice. MISTRG-6-15 mice were infected with HIV-1<sub>BAL</sub>. Tissue analyses were performed on day 14 post infection. Error bars show mean values with SEM. *P*-values were calculated using one-way ANOVA with Tukey multi-comparison post-test. \*\*\*\* denotes *p*-value <0.0001.

**Figure S11**

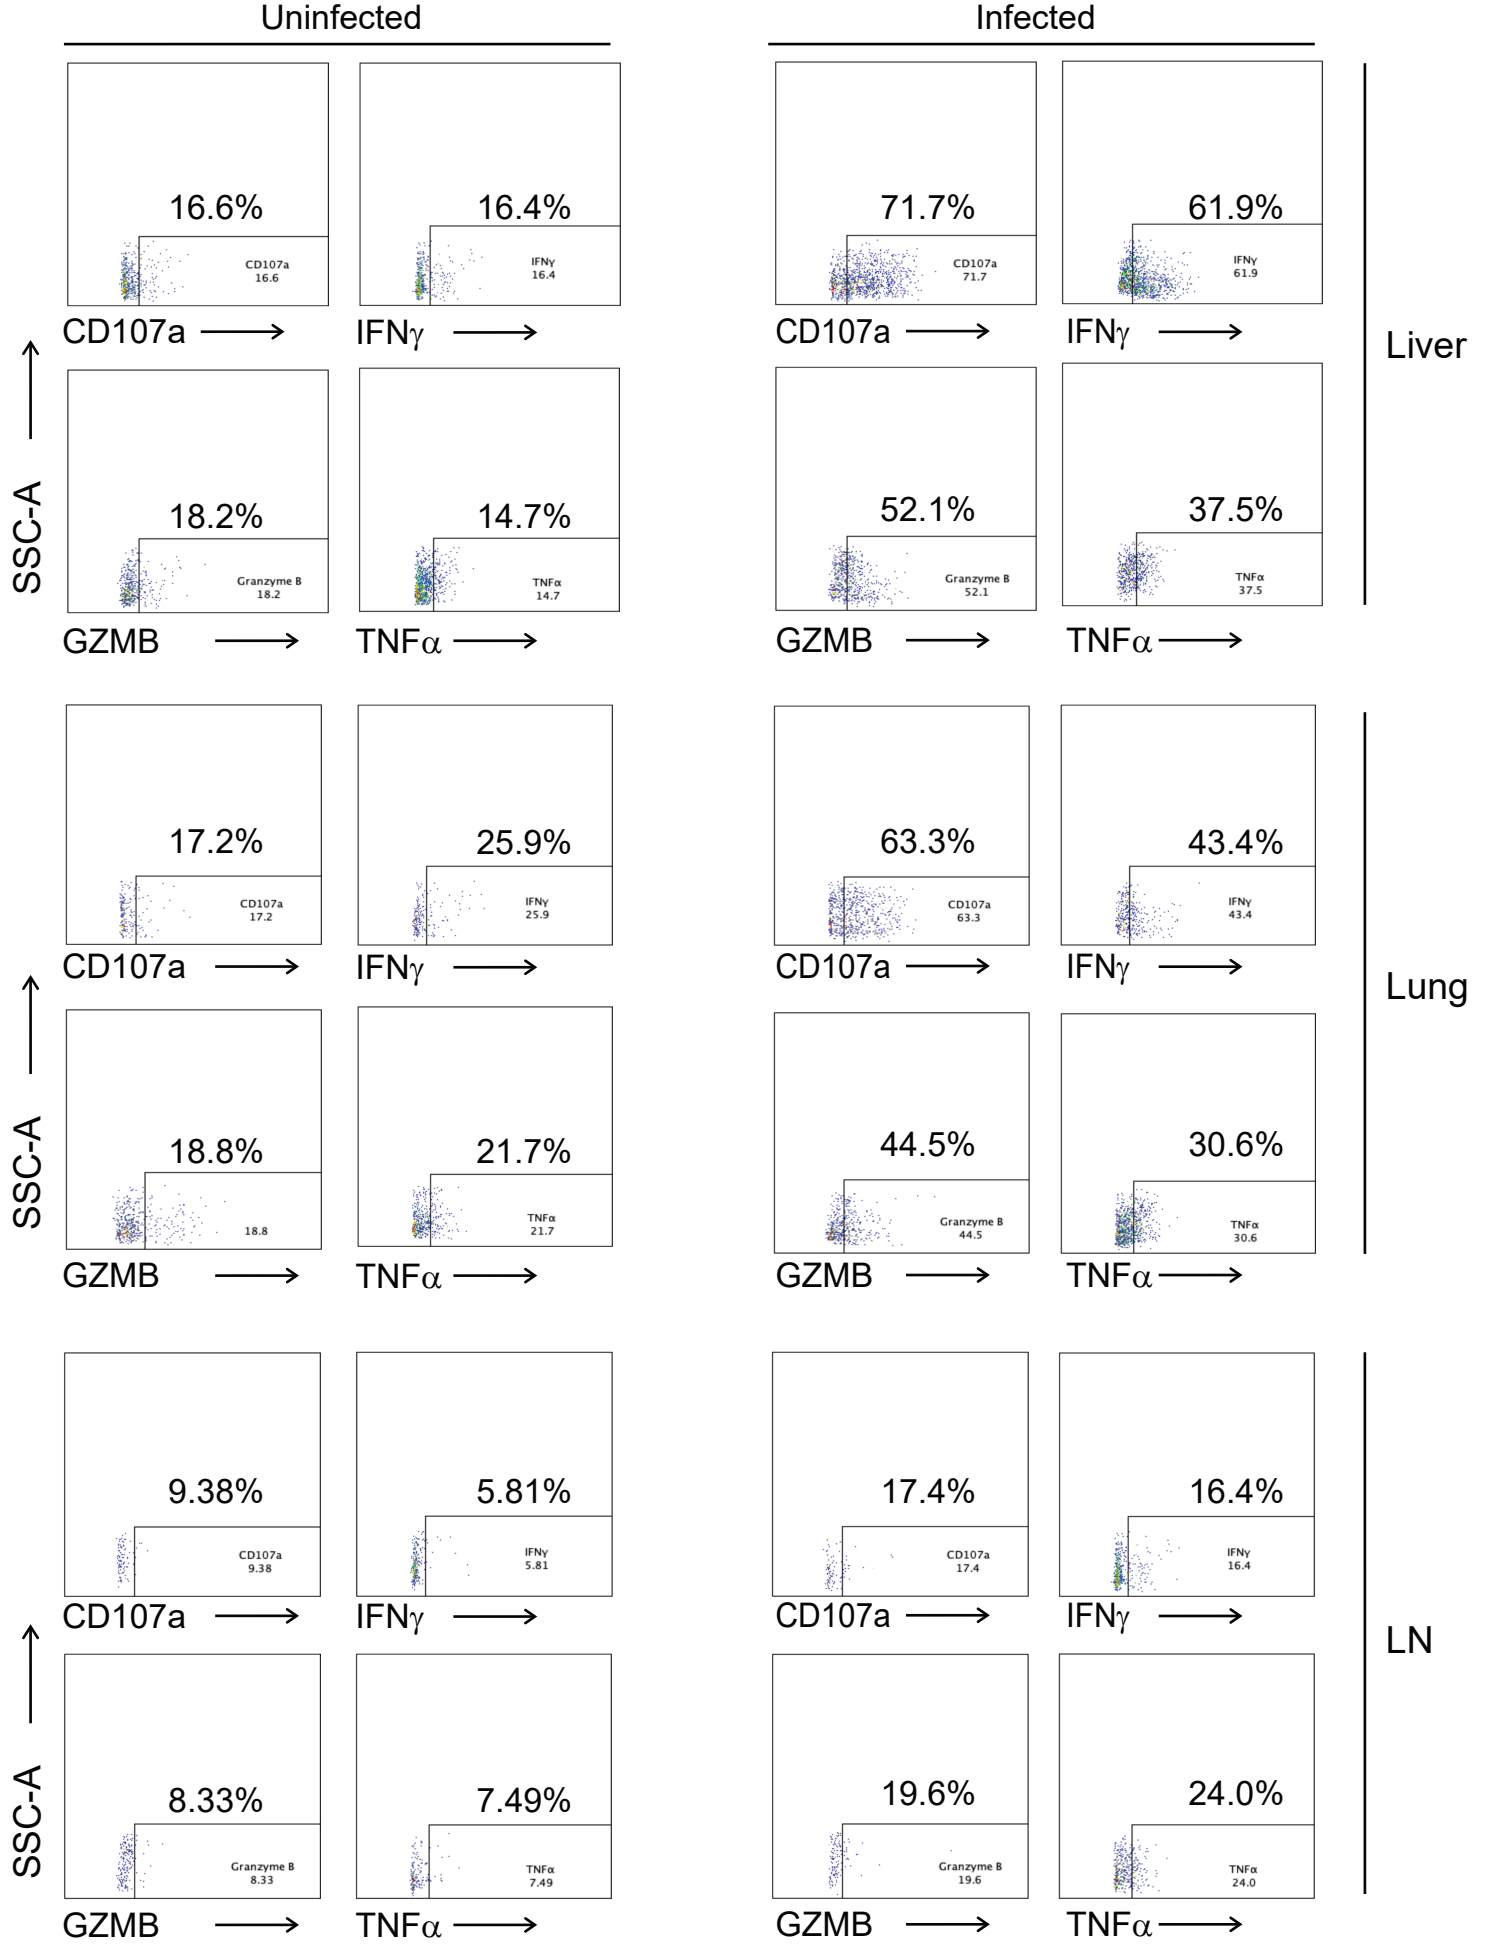

**Supplemental Fig. 11. NK cell cytokine production by intracellular staining.** MISTRG-6-15 mice were infected with HIV-1<sub>BAL</sub> or left uninfected. Tissue samples were collected on day 21 post infection. Representative flow plots for CD107a, GZMB, IFN $\gamma$ , and TNF $\alpha$  staining after ex vivo stimulation with PMA/ionomycin for 4 hrs. NK cells were gated on huCD45<sup>+</sup>CD3<sup>-</sup>CD56<sup>+</sup>.
